# Supplementary material for: Compositional Features of HDL Particles Interact with Albuminuria to Modulate Cardiovascular Disease Risk
Source: Int J Mol Sci. 2019 Feb 23;20(4):977. doi: 10.3390/ijms20040977 (PMC6412699; doi:10.3390/ijms20040977)
Supplement: Supplementary file 1 [file ijms-20-00977-s001.pdf]

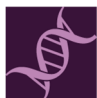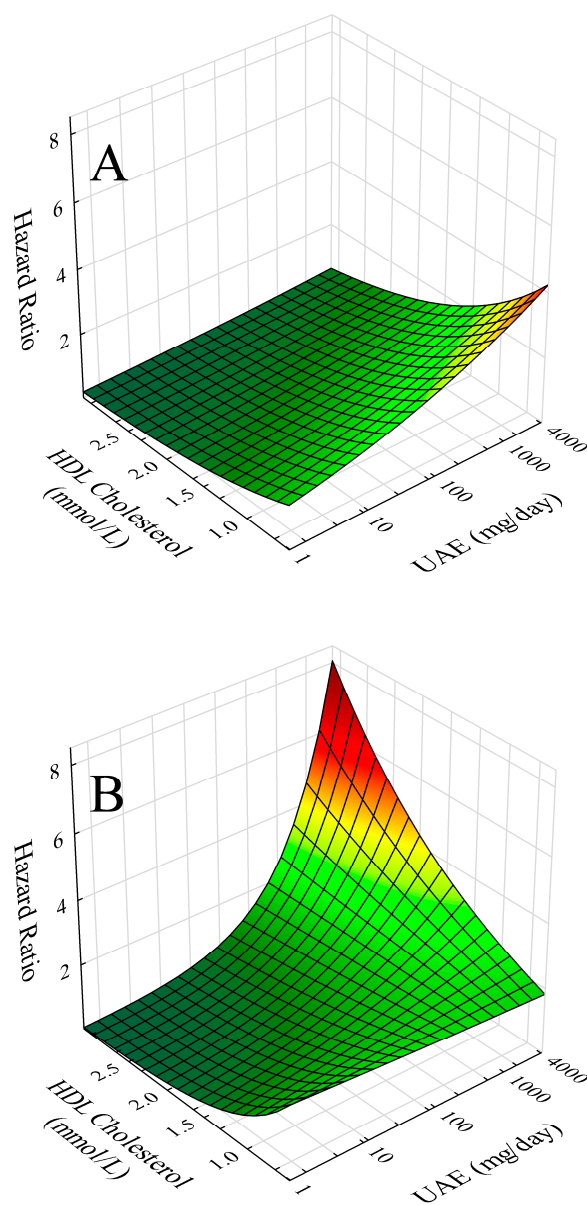

**Figure S1.** Hazard ratio for cardiovascular disease risk as a function of urinary albumin excretion (UAE) and HDL-C: (A) without inclusion of interaction of UAE and HDL particle concentration; and (B) with inclusion of interaction of UAE and HDL particle concentration.

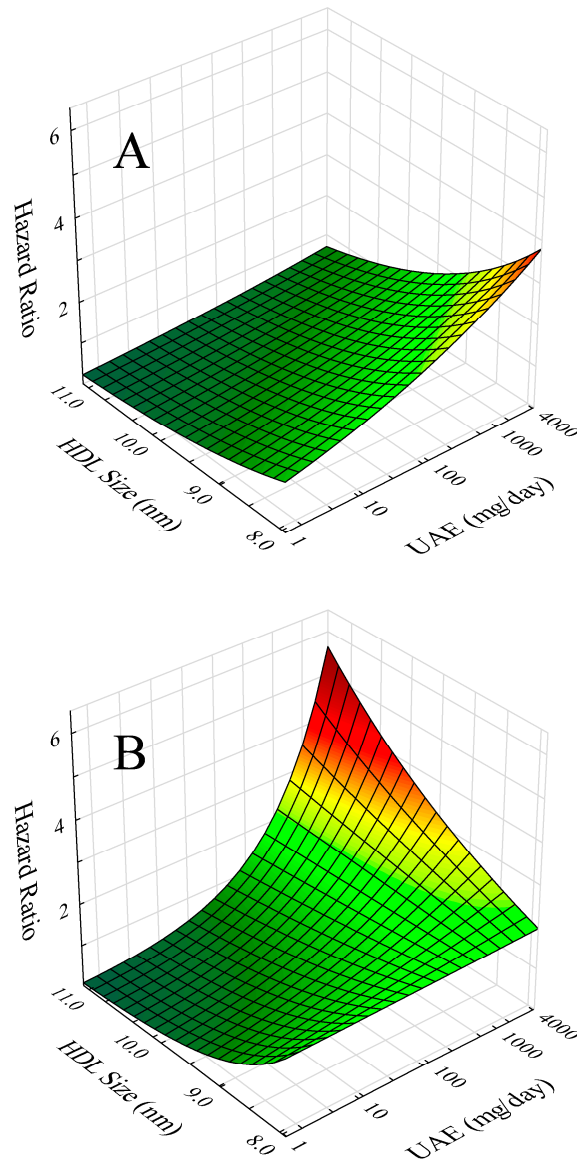

**Figure S2.** Hazard ratio for cardiovascular disease risk as a function of urinary albumin excretion (UAE) and mean HDL particle size (nm): A. without inclusion of interaction of UAE and HDL particle size; and B. with inclusion of interaction of UAE and HDL particle size.

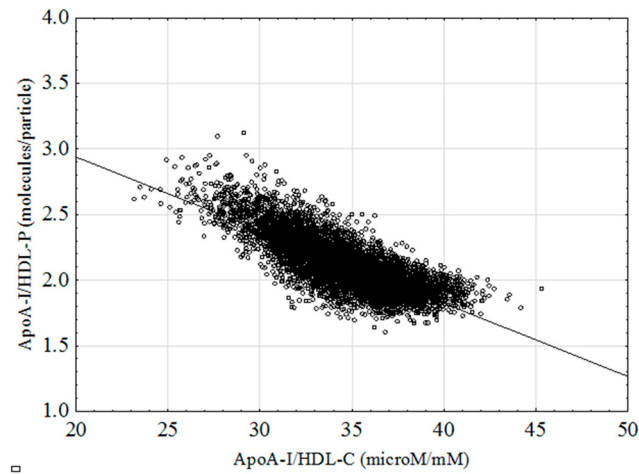

**Figure S3.** Scatter plot of apoA-I/HDL-P versus apoA-I/HDL-C. Regression:  $\text{ApoA1/HDL-P} = 4.0546 - 0.0558 \times \text{ApoA-I/HDL-C}$ ,  $r = -0.78$ ,  $p < 0.0001$ .

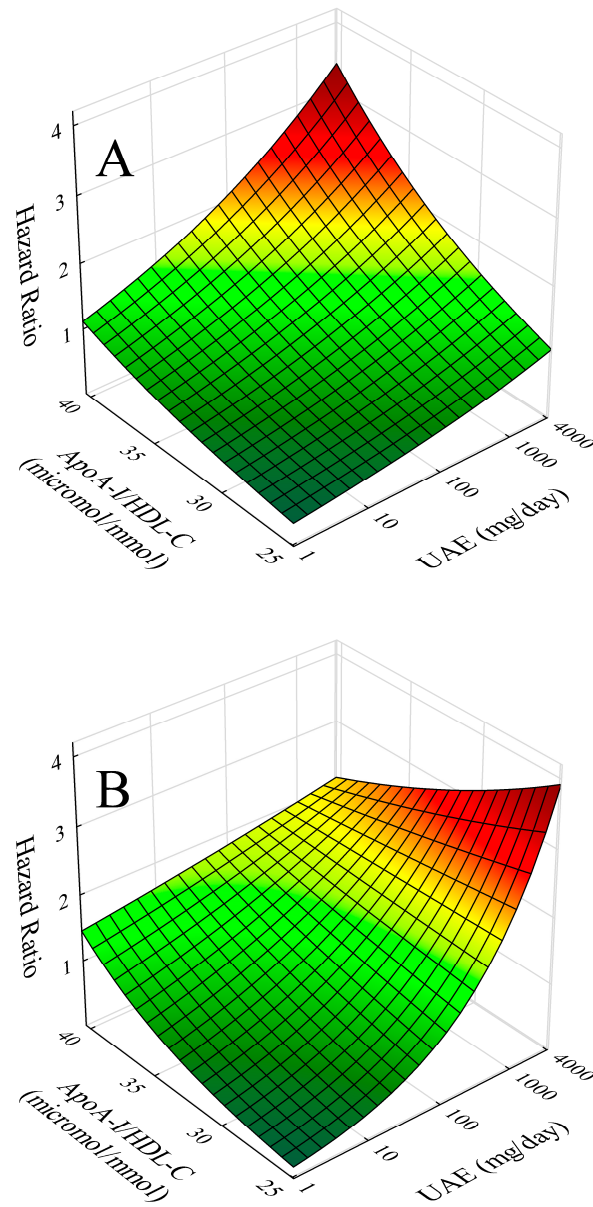

**Figure S4.** Hazard ratio for cardiovascular disease risk as a function of UAE and apoA-I/HDL-C: A. without inclusion of interaction of UAE and apoA-I/HDL-C; and B. with inclusion of interaction of UAE and apoA-I/HDL-C.
